# Supplementary material for: Gold nano particles catalyzed oxidation of hydrazine by a metallo-superoxide complex: experimental evidences for surface activity of gold nano particles
Source: Royal Society of Chemistry journal article supplement (doi:10.1039/c2dt12191c), 2012-01-01
Supplement: c2dt12191c.pdf [file c2dt12191c.pdf]

**ELECTRONIC SUPPLEMENTARY INFORMATION**

**Gold nano particles catalyzed oxidation of hydrazine by a metallo-superoxide complex: Experimental evidences for surface activity of gold nanoparticles**

Ranendu Sekhar Das<sup>†</sup>, Bula Singh<sup>‡</sup>, Subrata Mukhopadhyay<sup>\*†</sup> and Rupendranath Banerjee<sup>\*†</sup>

<sup>†</sup> Department of Chemistry, Jadavpur University, Kolkata 700 032, India

<sup>‡</sup> Department of Chemistry, Visva-Bharati, Santiniketan 731 235, India

\* (S.M.) E-mail: smukhopadhyay@chemistry.jdvu.ac.in, Fax: (+) 91 33 2414 6623

(R.N.B) E-mail: rупenju@yahoo.com

| <b>Content</b>                      | <b>Page</b> |
|-------------------------------------|-------------|
| Derivation of the proposed rate law | S2          |
| Table S1                            | S3          |
| Table S2                            | S3          |
| Table S3                            | S4          |
| Table S4                            | S4          |
| Figure S1                           | S5          |

**Derivation of the proposed rate law:**

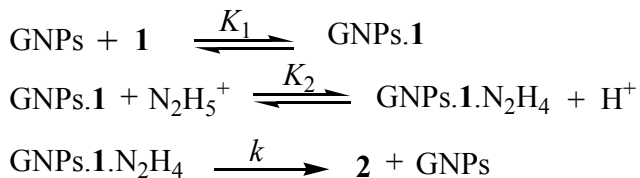

$$K_1 = [\text{GNPs.}\mathbf{1}] / [\text{GNPs}] [\mathbf{1}]$$

$$K_2 = [\text{GNPs.}\mathbf{1}.\text{N}_2\text{H}_4] [\text{H}^+] / [\text{GNPs.}\mathbf{1}] [\text{N}_2\text{H}_5^+]$$

$$[\text{GNPs.}\mathbf{1}.\text{N}_2\text{H}_4] = [\text{A}] \text{ (say)}$$

$$= (K_2 [\text{GNPs.}\mathbf{1}] [\text{N}_2\text{H}_5^+] / [\text{H}^+]) = (K_1 K_2 [\text{GNPs}] [\mathbf{1}] [\text{N}_2\text{H}_5^+] / [\text{H}^+])$$

$$\text{Total concentration of } \mathbf{1} = T_1 \text{ (say)}$$

$$= [\mathbf{1}] + [\text{GNPs.}\mathbf{1}] + [\text{GNPs.}\mathbf{1}.\text{N}_2\text{H}_4]$$

$$= [\mathbf{1}] + K_1 [\text{GNPs}] [\mathbf{1}] + (K_1 K_2 [\text{GNPs}] [\mathbf{1}] [\text{N}_2\text{H}_5^+] / [\text{H}^+])$$

$$= [\mathbf{1}] (1 + K_1 [\text{GNPs}] + (K_1 K_2 [\text{GNPs}] [\text{N}_2\text{H}_5^+] / [\text{H}^+]))$$

$$[\mathbf{1}] = T_1 [\text{H}^+] / ([\text{H}^+] + K_1 [\text{GNPs}] [\text{H}^+] + K_1 K_2 [\text{GNPs}] [\text{N}_2\text{H}_5^+])$$

$$k_o T_1 = k [\text{A}]$$

$$= (k K_1 K_2 [\text{GNPs}] [\text{N}_2\text{H}_5^+]) / ([\text{H}^+] + K_1 [\text{GNPs}] [\text{H}^+] + K_1 K_2 [\text{GNPs}] [\text{N}_2\text{H}_5^+])$$

$$\approx (k K_1 K_2 [\text{GNPs}] [\text{T}_{\text{Hydrazine}}]) / ([\text{H}^+] + K_1 [\text{GNPs}] [\text{H}^+] + K_1 K_2 [\text{GNPs}] [\text{T}_{\text{Hydrazine}}])$$

$$1 / k_o = ([\text{H}^+] / k K_1 K_2 [\text{GNPs}] [\text{T}_{\text{Hydrazine}}]) + ([\text{H}^+] / k K_2 [\text{T}_{\text{Hydrazine}}]) + (1 / k)$$

This equation is the Eqn. (7) of the main text ( $T_1$  and  $[\text{T}_{\text{Hydrazine}}]$  are the stoichiometric concentration of complex  $\mathbf{1}$  and hydrazine).

**Table S1:** The variation of  $k_0$  values with different concentration of 23 nm GNPs.

|                               |     |      |      |      |      |      |      |      |
|-------------------------------|-----|------|------|------|------|------|------|------|
| $10^{13}$ [GNPs]<br>(M)       | 6.7 | 13.3 | 20.0 | 26.7 | 33.3 | 50.0 | 66.7 | 83.3 |
| $10^3 k_0$ (s <sup>-1</sup> ) | 0.4 | 0.8  | 1.7  | 2.6  | 3.1  | 4.6  | 5.7  | 7.3  |

**Table S2:** Variation of  $k_0$  values with pH of the medium.

| pH  | $10^{-4} / [\text{H}^+]$<br>(M <sup>-1</sup> ) | $10^3 k_0$ (s <sup>-1</sup> ) |
|-----|------------------------------------------------|-------------------------------|
| 3.5 | 0.32                                           | 1.0                           |
| 4.0 | 1.00                                           | 3.1                           |
| 4.7 | 5.00                                           | 5.6                           |
| 5.0 | 10.00                                          | 4.0                           |
| 5.2 | 16.70                                          | 14.3                          |
| 5.7 | 50.00                                          | 37.8                          |

[**1**] = 0.30 mM; T<sub>Hydrazine</sub> = 30.0 mM; [GNPs] =  $33.3 \times 10^{-13}$  M (23 nm); [dpa] = 2.0 mM;

T = 25.0 (± 0.1) °C

**Table S3:** The slope, intercept and the regression values for Fig. 10.

| Temperature (K) | 288          | 293   | 298            | 303           | 308           |
|-----------------|--------------|-------|----------------|---------------|---------------|
| Slope           | $23 \pm 3$   | 17.2  | $10.2 \pm 0.4$ | $7.6 \pm 0.6$ | $5.9 \pm 0.1$ |
| Intercept       | $412 \pm 62$ | 184.7 | $56 \pm 8$     | $68 \pm 12$   | $65 \pm 2$    |
| r               | 0.982        | 0.999 | 0.998          | 0.994         | 0.999         |

**Table S4:** Total surface area of GNP of size 23 nm and the corresponding  $k_0$  values.

|                                                                         |     |      |      |      |      |      |      |      |
|-------------------------------------------------------------------------|-----|------|------|------|------|------|------|------|
| $10^{13}$ [GNPs] (M)                                                    | 6.7 | 13.3 | 20.0 | 26.7 | 33.3 | 50.0 | 66.7 | 83.3 |
| $10^4$ SA<br>( $C.4\pi r^2 \cdot N_A$ ) <sup>b</sup><br>( $m^2L^{-1}$ ) | 6.7 | 13.3 | 20.0 | 26.7 | 33.3 | 50.0 | 66.7 | 83.3 |

<sup>b</sup> Surface area of single particle ( $4\pi r^2$ ) =  $16.6 \times 10^{-16} m^2$ ;  $N_A$  is Avogadro number.

[**1**] = 0.30 mM;  $T_{\text{Hydrazine}}$  = 30.0 mM; [dpa] = 2.0 mM; pH = 4.0; T = 25.0 ( $\pm 0.1$ ) °C.

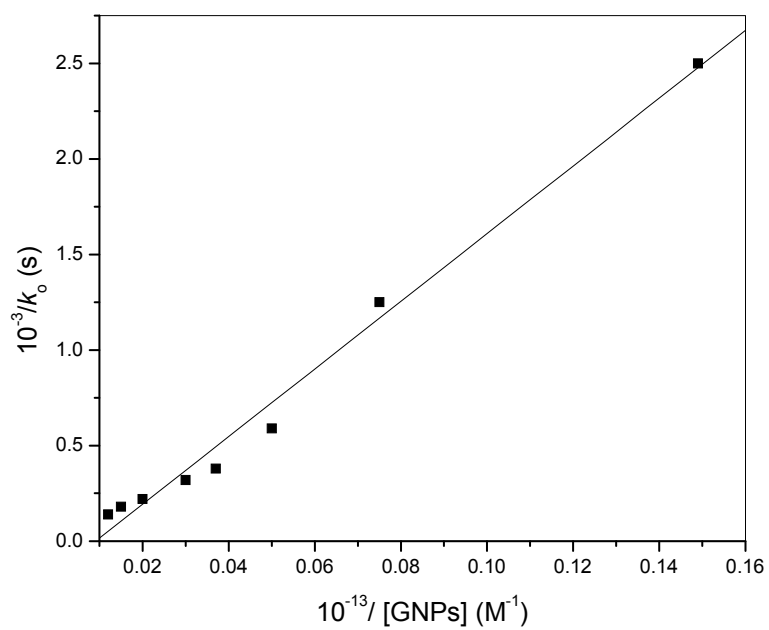

**Fig. S1:** A plot of variation of  $1/k_0$  with  $1/[\text{GNPs}]$  (see Table S1).
